# Supplementary material for: Development and performance of a targeted whole exome sequencing enrichment kit for the dog (Canis Familiaris Build 3.1)
Source: PubMed Central journal article supplement (PMC4083258; doi:10.1038/srep05597), 2014-07-07
Supplement: srep05597-s1.pdf [file srep05597-s1.pdf]

**Development and performance of a targeted whole exome sequencing enrichment kit for the dog (*Canis Familiaris* Build 3.1)**

Bart JG Broeckx<sup>1</sup>, Frank Coopman<sup>2</sup>, Geert EC Verhoeven<sup>3</sup>, Valérie Bavegems<sup>4</sup>, Sarah De Keulenaer<sup>1</sup>, Ellen De Meester<sup>1</sup>, Filip Van Niewerburgh<sup>1‡</sup>, Dieter Deforce<sup>1‡\*</sup>

<sup>1</sup> Laboratory of Pharmaceutical Biotechnology, Faculty of Pharmaceutical Sciences, Ghent University, Ghent, Belgium

<sup>2</sup> Department of Applied Biosciences, Faculty of Biosciences Engineering, Ghent University, Ghent, Belgium

<sup>3</sup> Department of Medical Imaging and Small Animal Orthopaedics, Faculty of Veterinary Medicine, Ghent University, Merelbeke, Belgium

<sup>4</sup> Department of Medicine and Clinical Biology of Small Animals, Faculty of Veterinary Medicine, Ghent University, Merelbeke, Belgium

‡ These authors contributed equally to this work.

**Supplementary Table S1 Per sample per chromosome specificity (calculated as mapped reads on target/total number of mapped reads)**

| Chr | Specificity per sample (%) |       |       |       |       |       |       |       |
|-----|----------------------------|-------|-------|-------|-------|-------|-------|-------|
|     | 1                          | 2     | 3     | 4     | 5     | 6     | 7     | 8     |
| 1   | 92.23                      | 91.96 | 92.57 | 92.26 | 91.65 | 91.3  | 91.20 | 91.79 |
| 2   | 91.59                      | 91.29 | 92.02 | 91.71 | 91.01 | 90.66 | 90.52 | 91.10 |
| 3   | 89.48                      | 89.41 | 89.96 | 89.78 | 88.43 | 88.17 | 87.83 | 88.59 |
| 4   | 90.26                      | 90.12 | 90.64 | 90.53 | 89.43 | 89.05 | 88.75 | 89.46 |
| 5   | 92.82                      | 92.55 | 93.17 | 92.8  | 92.32 | 91.91 | 91.82 | 92.38 |
| 6   | 92.68                      | 92.46 | 93.13 | 92.74 | 92.26 | 91.8  | 91.75 | 92.44 |
| 7   | 91.95                      | 91.67 | 92.24 | 92.13 | 91.37 | 90.92 | 90.82 | 91.39 |
| 8   | 90.28                      | 90.10 | 90.80 | 90.44 | 89.63 | 89.31 | 89.12 | 89.86 |
| 9   | 94.19                      | 93.88 | 94.53 | 94.17 | 94.22 | 93.66 | 93.66 | 94.11 |
| 10  | 91.45                      | 91.26 | 91.88 | 91.61 | 90.84 | 90.49 | 90.36 | 90.96 |
| 11  | 91.06                      | 90.88 | 91.36 | 91.19 | 90.43 | 90.07 | 89.88 | 90.46 |
| 12  | 91.73                      | 91.53 | 92.16 | 91.89 | 91.17 | 90.86 | 90.69 | 91.35 |
| 13  | 89.63                      | 89.63 | 90.18 | 90.14 | 88.60 | 88.50 | 88.09 | 88.80 |
| 14  | 89.98                      | 89.81 | 90.37 | 90.29 | 88.99 | 88.75 | 88.42 | 89.05 |
| 15  | 91.03                      | 90.83 | 91.47 | 91.28 | 90.31 | 90.01 | 89.80 | 90.40 |
| 16  | 89.82                      | 89.33 | 90.31 | 89.89 | 88.66 | 88.59 | 88.71 | 89.20 |
| 17  | 91.99                      | 91.74 | 92.38 | 92.12 | 91.50 | 91.07 | 91.00 | 91.50 |
| 18  | 92.91                      | 92.63 | 93.28 | 92.80 | 92.44 | 92.12 | 92.07 | 92.66 |
| 19  | 85.92                      | 86.31 | 86.69 | 86.73 | 84.87 | 84.63 | 83.91 | 84.78 |
| 20  | 93.36                      | 93.01 | 93.69 | 93.12 | 93.12 | 92.70 | 92.74 | 93.30 |
| 21  | 91.15                      | 90.93 | 91.46 | 91.12 | 90.43 | 90.09 | 90.03 | 90.54 |
| 22  | 84.69                      | 84.86 | 85.38 | 85.35 | 83.18 | 83.21 | 82.59 | 83.44 |
| 23  | 90.41                      | 90.34 | 90.78 | 90.77 | 89.64 | 89.27 | 88.96 | 89.58 |
| 24  | 92.08                      | 91.89 | 92.44 | 92.05 | 91.55 | 91.14 | 91.06 | 91.68 |
| 25  | 90.81                      | 90.68 | 91.29 | 91.11 | 90.07 | 89.85 | 89.62 | 90.25 |
| 26  | 92.22                      | 91.96 | 92.55 | 92.19 | 91.95 | 91.53 | 91.34 | 92.02 |
| 27  | 92.33                      | 92.01 | 92.65 | 92.37 | 91.98 | 91.54 | 91.50 | 92.06 |
| 28  | 91.64                      | 91.47 | 92.02 | 91.93 | 91.26 | 90.77 | 90.60 | 91.03 |
| 29  | 88.01                      | 87.98 | 88.57 | 88.75 | 86.75 | 86.59 | 85.97 | 86.70 |
| 30  | 92.91                      | 92.66 | 93.22 | 93.06 | 92.70 | 92.28 | 92.03 | 92.57 |
| 31  | 86.13                      | 86.18 | 86.75 | 86.23 | 84.99 | 84.57 | 84.36 | 85.40 |
| 32  | 88.97                      | 88.81 | 89.37 | 89.57 | 88.30 | 88.08 | 87.72 | 88.19 |
| 33  | 91.77                      | 91.67 | 92.05 | 92.13 | 91.20 | 90.76 | 90.61 | 91.05 |
| 34  | 88.89                      | 88.71 | 89.31 | 89.08 | 87.74 | 87.52 | 87.12 | 87.96 |
| 35  | 89.14                      | 89.03 | 89.53 | 89.41 | 88.07 | 87.84 | 87.42 | 88.21 |
| 36  | 92.80                      | 92.67 | 93.20 | 93.30 | 92.20 | 91.95 | 91.73 | 92.04 |
| 37  | 91.20                      | 91.10 | 91.62 | 91.57 | 90.66 | 90.26 | 90.00 | 90.58 |
| 38  | 91.20                      | 90.98 | 91.70 | 91.16 | 90.46 | 90.16 | 89.97 | 90.63 |
| X   | 87.85                      | 87.88 | 88.53 | 87.99 | 87.74 | 87.62 | 87.26 | 87.89 |

**Supplementary Table S2 Non-reference variants detected on target per sample**

| Sample | Variants (bidirectional) | Variants |
|--------|--------------------------|----------|
| 1      | 57,827                   | 65,060   |
| 2      | 56,401                   | 63,491   |
| 3      | 58,769                   | 66,639   |
| 4      | 57,623                   | 64,793   |
| 5      | 60,444                   | 67,222   |
| 6      | 60,576                   | 67,890   |
| 7      | 55,683                   | 62,117   |
| 8      | 58,615                   | 65,967   |

The second and third column show the number of variants being called with and without “the “require presence in both forward and reverse reads” setting being applied, respectively.

**Supplementary Table S3 Primers (and their efficiencies) used to assess fold enrichment**

| Primer | Forward                      | Reverse                       | E    | Chr |
|--------|------------------------------|-------------------------------|------|-----|
| 1      | 5'-CGCATTCCCTCATCCCAGTATG-3' | 5'-AAAGGACTTGGTGCAGAGTTCAG-3' | 1.60 | 12  |
| 2      | 5'-GTAGTGAGGCGAGTGGCTTT-3'   | 5'-CCGACAGCACTACATGGGTT-3'    | 2.06 | 36  |
| 3      | 5'-CTCCTGGGGCACAAATGAGT-3'   | 5'-AGGGAGAATATGGCCACCT-3'     | 1.81 | 30  |
| 4      | 5'-TCTGTGAGGGTGGCTTTTCC-3'   | 5'-TCTCTGGGGCATCTGTGAGA-3'    | 1.75 | 17  |
| 5      | 5'-TCGCTGACGTGTTCAAAGGA-3'   | 5'-AGAACCCACGCCTGAAGATG-3'    | 1.67 | 3   |

The second and third column contain the sequences of all five primers. Primer one is the standard primer provided by Nimblegen (NSC-0237). The fourth column contains the efficiency of amplification (E) as calculated with the following formula:  $E = 10^{(-1/\text{slope of standard curve})}$ . The chromosome on which the control locus is located is mentioned in the fifth column.
